# Supplementary material for: Dissecting Toxicity: The Venom Gland Transcriptome and the Venom Proteome of the Highly Venomous Scorpion Centruroides limpidus (Karsch, 1879)
Source: MDPI journal article supplement (doi:10.3390/toxins11050247), 2019-04-30
Supplement: s1 [file s1]

# Supplementary Materials: Dissecting Toxicity: The Venom Gland Transcriptome and the Venom Proteome of the Highly Venomous Scorpion *Centruroides limpidus* (Karsch, 1879)

Jimena I. Cid-Urbe, Erika P. Meneses, Cesar V.F. Batista, Ernesto Ortiz and Lourival D. Possani

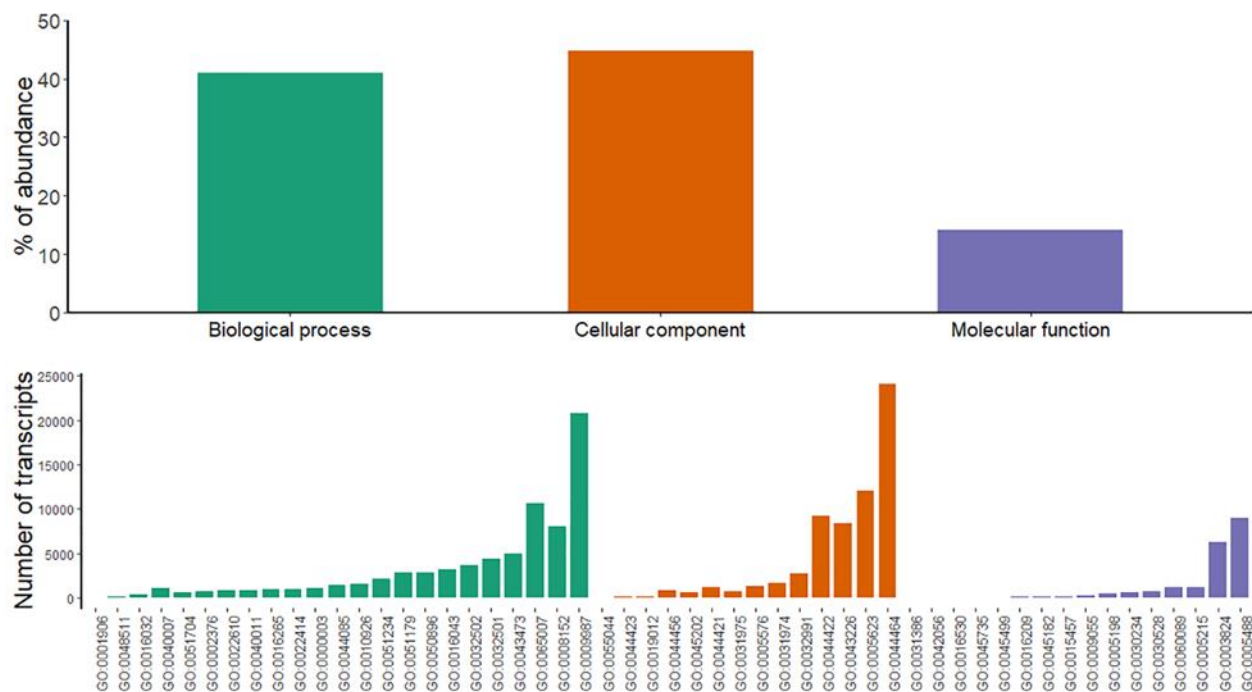

**Figure 1.** Distribution of the annotated transcripts in accordance to Gene Ontology (GO) terms.

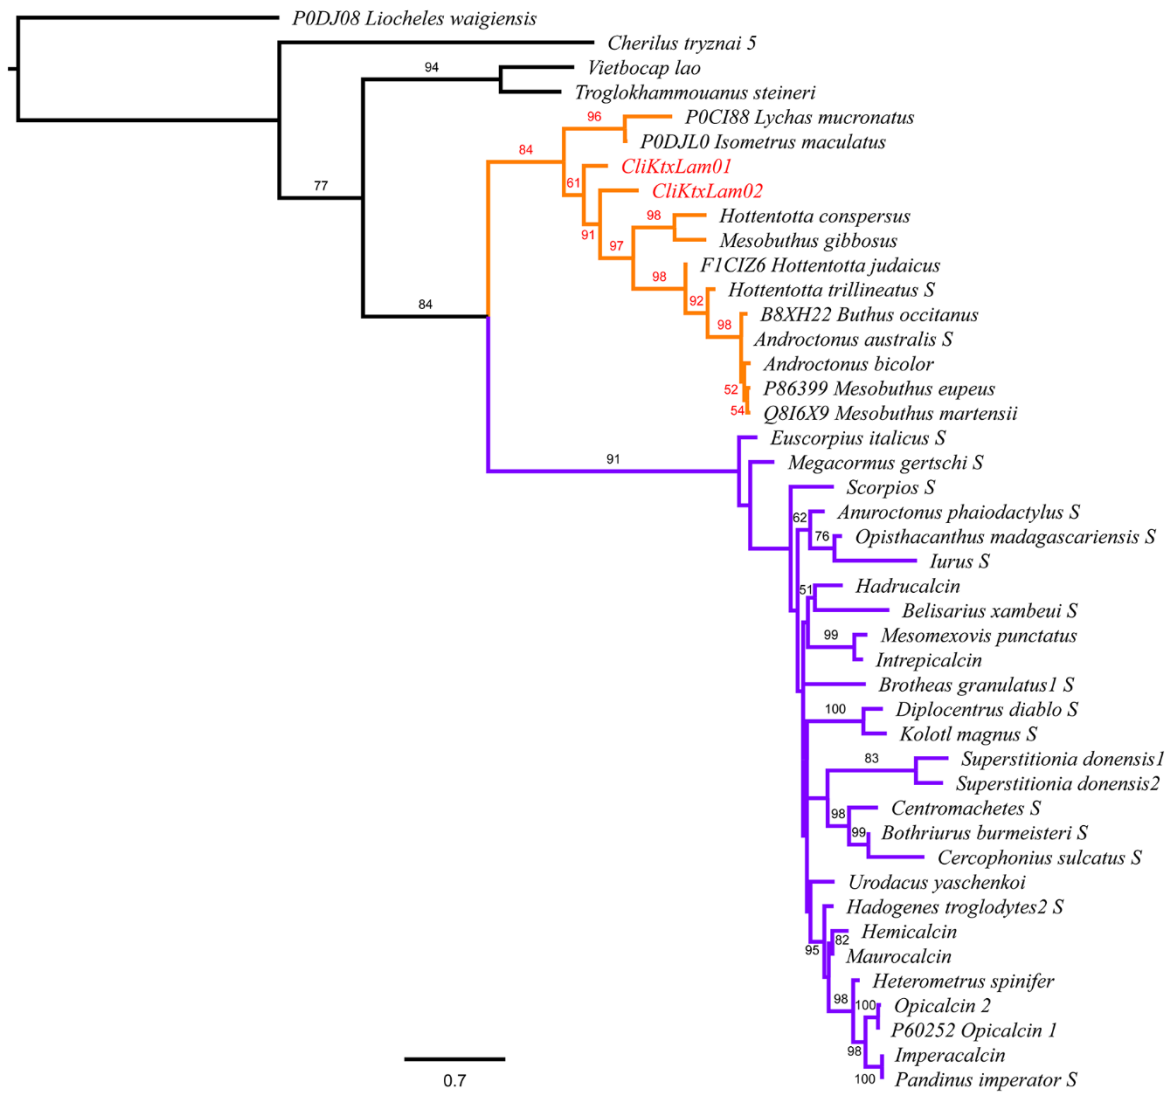

**Figure S2:** Phylogenetic tree of scorpion toxins with the ICK fold
